# Supplementary material for: The guanine exchange factor SWAP70 mediates vGPCR-induced endothelial plasticity
Source: PubMed Central journal article supplement (PMC4336709; doi:10.1186/s12964-015-0090-1), 2015-02-15
Supplement: 12964_2015_90_MOESM3_ESM.pdf [file 12964_2015_90_MOESM3_ESM.pdf]

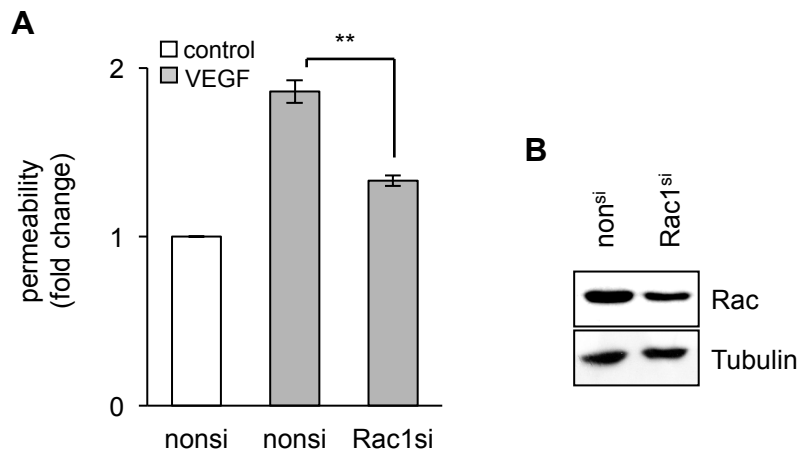

**Figure S1. Effect of Rac silencing on VEGF-induced permeability.**

**A.** Permeability of SVEC that were transfected with non-silencing siRNA (non<sup>si</sup>) or siRNA against Rac1 (Rac<sup>si</sup>). **B.** Silencing of Rac1 was confirmed by western-blot in total lysates, 3 days post-transfection.
