# Supplementary material for: The guanine exchange factor SWAP70 mediates vGPCR-induced endothelial plasticity
Source: Springer Nature journal article supplement (doi:10.1186/s12964-015-0090-1), 2015-02-15
Supplement: MOESM2 [file 12964_2015_90_MOESM2_ESM.pdf]

| Gene      | Permeability fold (GEFsi/nonsi) in vGPCR cells | Permeability fold (GEFsi/nonsi) in IL8-stimulated cells |
|-----------|------------------------------------------------|---------------------------------------------------------|
| ABR       | 36%                                            | 33%                                                     |
| AKAP13    | 109%                                           | 107%                                                    |
| ALS2      | 103%                                           | 60%                                                     |
| ARHGEF10  | 97%                                            | 127%                                                    |
| ARHGEF10L | 59%                                            | 79%                                                     |
| ARHGEF15  | 30%                                            | 95%                                                     |
| ARHGEF16  | 32%                                            | 145%                                                    |
| ARHGEF17  | 47%                                            | 95%                                                     |
| ARHGEF18  | 95%                                            | 90%                                                     |
| ARHGEF19  | 105%                                           | 93%                                                     |
| ARHGEF2   | 87%                                            | 90%                                                     |
| ARHGEF3   | 37%                                            | 47%                                                     |
| ARHGEF4   | 128%                                           | 111%                                                    |
| ARHGEF5   | 88%                                            | 96%                                                     |
| ARHGEF9   | 82%                                            | 87%                                                     |
| BCR       | 29%                                            | 53%                                                     |
| C9orf100  | 42%                                            | 78%                                                     |
| COOL1     | 118%                                           | 120%                                                    |
| COOL2     | 140%                                           | 134%                                                    |
| Dbl       | 34%                                            | 122%                                                    |
| Dbs       | 31%                                            | 98%                                                     |
| DOCK1     | 34%                                            | 58%                                                     |
| DOCK10    | 39%                                            | 40%                                                     |
| DOCK11    | 50%                                            | 60%                                                     |
| DOCK2     | 60%                                            | 82%                                                     |
| DOCK3     | 83%                                            | 64%                                                     |
| DOCK4     | 90%                                            | 87%                                                     |
| DOCK5     | 66%                                            | 72%                                                     |
| DOCK6     | 50%                                            | 102%                                                    |
| DOCK7     | 32%                                            | 73%                                                     |
| DOCK8     | 34%                                            | 47%                                                     |
| DOCK9     | 30%                                            | 62%                                                     |
| ECT2      | 43%                                            | 81%                                                     |
| FARP1     | 94%                                            | 118%                                                    |
| FARP2     | 84%                                            | 94%                                                     |
| FGD1      | 38%                                            | 106%                                                    |
| FGD2      | 35%                                            | 82%                                                     |
| FGD3      | 49%                                            | 104%                                                    |
| FGD5      | 107%                                           | 139%                                                    |
| FGD6      | 113%                                           | 98%                                                     |
| FLJ43963  | 82%                                            | 94%                                                     |
| Frabin    | 40%                                            | 174%                                                    |
| GEFT      | 103%                                           | 117%                                                    |
| ITSN1     | 30%                                            | 75%                                                     |
| ITSN2     | 31%                                            | 169%                                                    |
| KALRN     | 120%                                           | 127%                                                    |
| KALRN     | 98%                                            | 104%                                                    |

|           |      |      |
|-----------|------|------|
| KIAA1909  | 41%  | 89%  |
| LARG      | 140% | 112% |
| LOC345930 | 33%  | 54%  |
| MCF2L2    | 79%  | 96%  |
| NET1      | 42%  | 50%  |
| NGEF      | 49%  | 92%  |
| OBSCN     | 100% | 115% |
| p115      | 105% | 95%  |
| PDZ-GEF   | 108% | 124% |
| PLEKHG1   | 81%  | 105% |
| PLEKHG2   | 108% | 112% |
| PLEKHG3   | 114% | 136% |
| PLEKHG4   | 85%  | 95%  |
| PLEKHG5   | 73%  | 49%  |
| PLEKHG6   | 27%  | 84%  |
| PREX1     | 88%  | 120% |
| PREX2     | 62%  | 79%  |
| RASGRF1   | 88%  | 87%  |
| RASGRF2   | 116% | 102% |
| RGNEF     | 70%  | 104% |
| Scambio   | 84%  | 79%  |
| SGEF      | 34%  | 33%  |
| SOS1      | 92%  | 82%  |
| SOS2      | 29%  | 75%  |
| SPATA13   | 93%  | 128% |
| SWAP70    | 44%  | 41%  |
| TIAM1     | 133% | 133% |
| TIAM2     | 88%  | 134% |
| TRIO      | 52%  | 88%  |
| Tuba      | 65%  | 97%  |
| VAV1      | 124% | 111% |
| VAV2      | 80%  | 126% |
| VAV3      | 126% | 125% |

**Table 1. GEF siRNA library screen on vGPCR- and IL-8-dependent endothelial permeability increase.**

vGPCR-expressing or IL-8 stimulated (50 ng/ml, 1h) human umbilical vein endothelial cells (HUVEC) were transfected with 4 different non silencing RNA sequences (nonsi) as controls, or 2 different sequences targeting the 80 GEFs (GEFsi, Qiagen, 50 nM). Three days later, permeability was assessed as described in methods. Results were expressed as the percentage of the values obtained for GEFsi (\*2) normalized to the mean of values obtained for nonsi conditions (\*4). Positive hits (decrease greater than 50%) are highlighted in green.
